# Supplementary material for: Pro-myogenic small molecules revealed by a chemical screen on primary muscle stem cells
Source: PubMed Central journal article supplement (PMC7547525; doi:10.1186/s13395-020-00248-z), 2020-10-09

# Supplementary Figure 2.

**A**

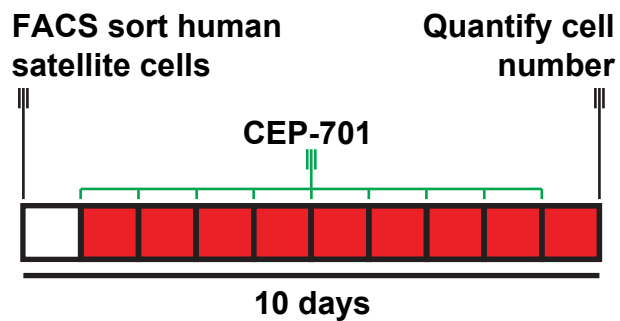

**B**

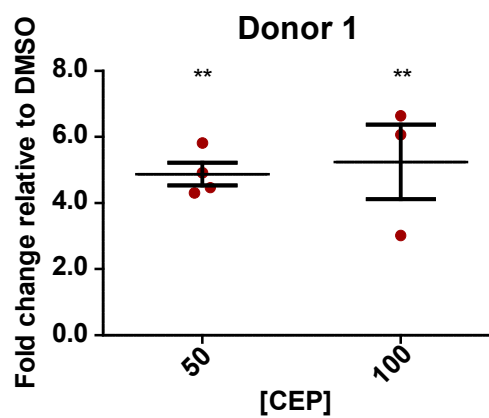

**C**

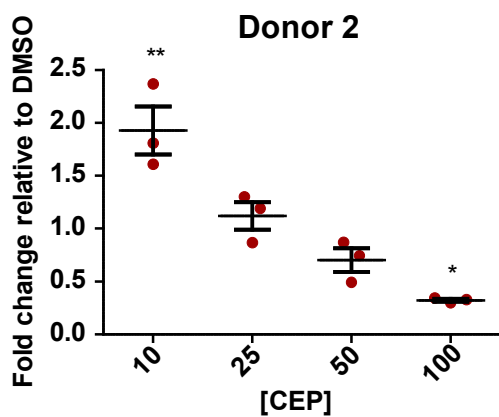

**D**

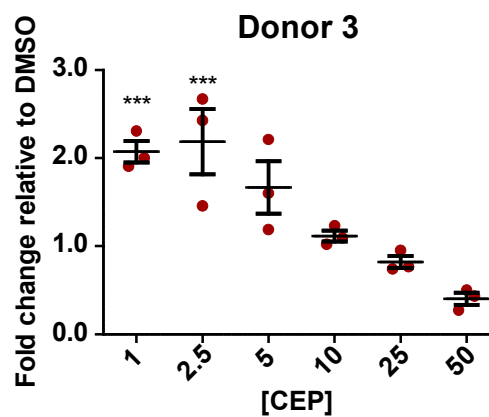

**E**

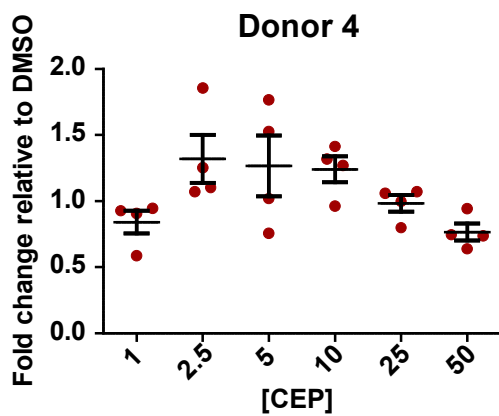

**F**

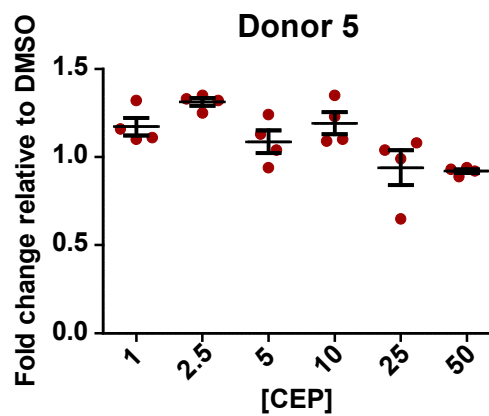

**G**

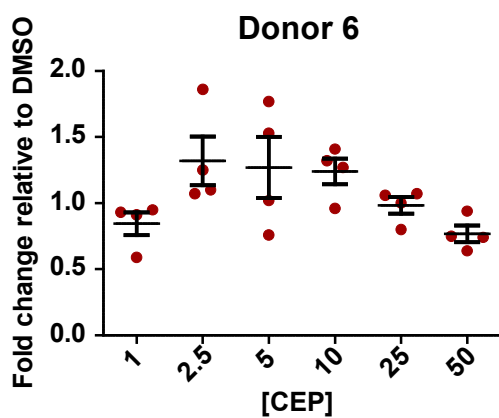

**H**

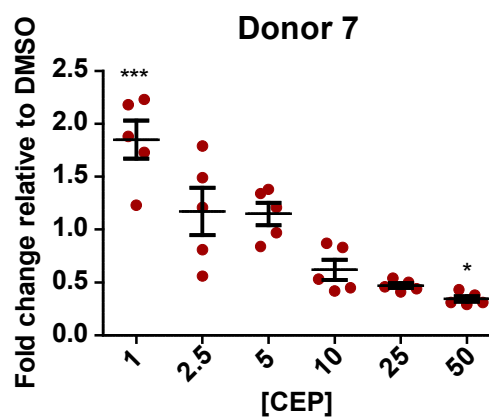

Supplement: 13395_2020_248_MOESM2_ESM.pdf [file 13395_2020_248_MOESM2_ESM.pdf]
