# Supplementary material for: Pro-myogenic small molecules revealed by a chemical screen on primary muscle stem cells
Source: PubMed Central journal article supplement (PMC7547525; doi:10.1186/s13395-020-00248-z), 2020-10-09

Supplementary Figure 5.

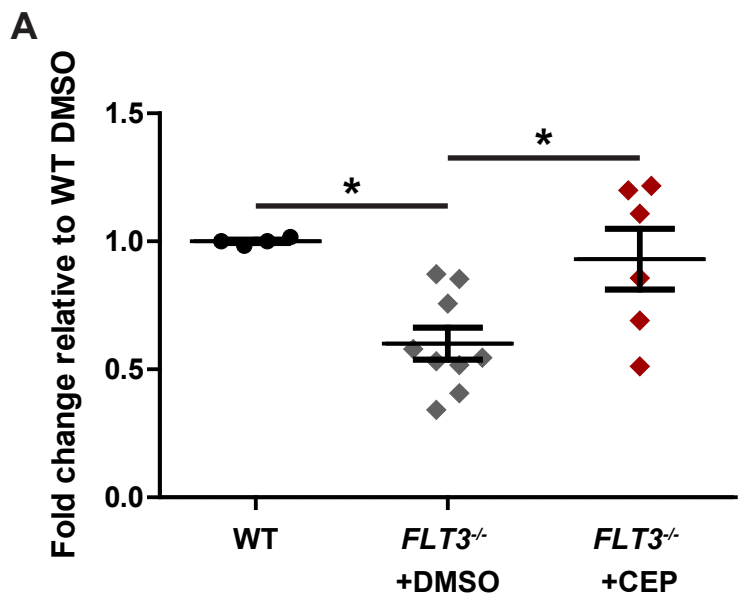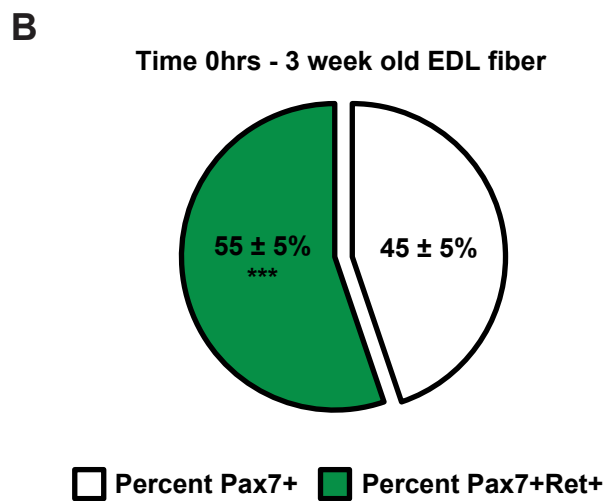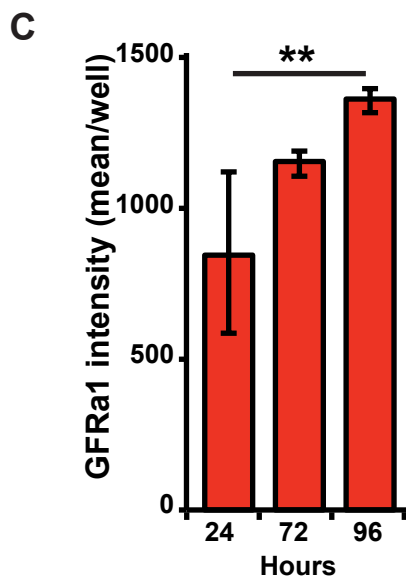

Supplement: 13395_2020_248_MOESM5_ESM.pdf [file 13395_2020_248_MOESM5_ESM.pdf]
